# Supplementary material for: Vascular Delivery of Allogeneic MuStem Cells in Dystrophic Dogs Requires Only Short-Term Immunosuppression to Avoid Host Immunity and Generate Clinical/Tissue Benefits
Source: PubMed Central journal article supplement — Cell Transplant. 2018 Jun 5;27(7):1096–110. doi: 10.1177/0963689718776306 (PMC6158548; doi:10.1177/0963689718776306), 2018-06-05
Supplement: Lorant_et_al_CT-1923_R1_Table_S1.pdf [file Lorant_et_al_CT-1923_R1_Table_S1.pdf]

**Table S1. Set of raw data relative to dog clinical score.** For each dog (referenced by its group, ID number and name), value attributed at different ages for individual criteria corresponding to dysphagia, mouth opening, firmness, suppleness, reflex and fence are indicated. Clinical score calculated by the sum of these 6 criteria and expressed as a percentage of those obtained by a healthy dog is added.

| GRMD dogs |           |          | Clinical criteria |               |          |            |        |             | Clinical score (%) |
|-----------|-----------|----------|-------------------|---------------|----------|------------|--------|-------------|--------------------|
| Group     | ID number | Age (mo) | Dysphagia         | Mouth opening | Firmness | Suppleness | Reflex | Fence       |                    |
| MU/no-IS  | 1         | 3.5      | 0.0               | 2.0           | 2.0      | 1.5        | 2.0    | 0.0         | <b>37.5</b>        |
|           |           | 3.6      | 0.0               | 1.0           | 2.0      | 1.5        | 2.0    | 1.0         | <b>37.5</b>        |
|           |           | 3.9      | 1.0               | 1.0           | 2.0      | 1.5        | 2.0    | 1.0         | <b>29.2</b>        |
|           |           | 4.4      | 1.0               | 2.0           | 2.0      | 1.5        | 1.0    | 0.0         | <b>37.5</b>        |
|           |           | 4.6      | 1.0               | 2.0           | 1.0      | 1.5        | 1.0    | 1.0         | <b>37.5</b>        |
|           |           | 4.9      | 1.0               | 2.0           | 2.0      | 2.0        | 2.0    | 1.0         | <b>16.7</b>        |
|           |           | 5.1      | 1.0               | 2.0           | 2.0      | 1.5        | 2.0    | 0.0         | <b>29.2</b>        |
|           |           | 5.3      | 1.0               | 1.0           | 2.0      | 2.0        | 2.0    | 0.0         | <b>33.3</b>        |
|           |           | 5.8      | 1.0               | 1.0           | 2.0      | 2.0        | 1.0    | 1.0         | <b>33.3</b>        |
|           |           | 6.4      | 1.0               | 2.0           | 2.0      | 2.0        | 1.0    | 0.0         | <b>33.3</b>        |
|           |           | 6.7      | 1.0               | 2.0           | 2.0      | 2.0        | 2.0    | 0.0         | <b>25.0</b>        |
|           |           | 7.1      | 1.0               | 2.0           | 2.0      | 2.0        | 1.0    | 0.0         | <b>33.3</b>        |
|           |           | 7.4      | 1.0               | 2.0           | 2.0      | 2.0        | 1.0    | 0.0         | <b>33.3</b>        |
|           |           | 7.7      | 1.0               | 1.0           | 2.0      | 2.0        | 2.0    | 0.0         | <b>33.3</b>        |
|           | 2         | 3.6      | 0.0               | 1.0           | 2.0      | 1.0        | 2.0    | 1.0         | <b>41.7</b>        |
|           |           | 3.9      | 0.0               | 0.0           | 2.0      | 1.0        | 1.0    | 0.0         | <b>66.7</b>        |
|           |           | 4.4      | 0.0               | 0.0           | 2.0      | 1.5        | 0.0    | 0.0         | <b>70.8</b>        |
|           |           | 4.6      | 0.0               | 1.0           | 2.0      | 1.0        | 0.0    | 0.0         | <b>66.7</b>        |
|           |           | 4.9      | 0.0               | 1.0           | 2.0      | 0.5        | 0.0    | 1.0         | <b>62.5</b>        |
|           |           | 5.1      | 1.0               | 1.0           | 1.0      | 1.0        | 0.0    | 0.0         | <b>66.7</b>        |
|           |           | 5.3      | 1.0               | 2.0           | 1.0      | 1.0        | 0.0    | 0.0         | <b>58.3</b>        |
|           |           | 5.8      | 1.0               | 1.0           | 1.0      | 1.5        | 0.0    | 0.0         | <b>62.5</b>        |
|           | 6.4       | 1.0      | 2.0               | 1.0           | 1.0      | 1.0        | 0.0    | <b>50.0</b> |                    |
|           | 3         | 3.5      | 0.0               | 2.0           | 2.0      | 0.0        | 0.0    | 0.0         | <b>66.7</b>        |
|           |           | 3.6      | 0.0               | 2.0           | 2.0      | 1.0        | 1.0    | 1.0         | <b>41.7</b>        |
|           |           | 3.9      | 0.0               | 1.0           | 2.0      | 0.0        | 2.0    | 0.0         | <b>58.3</b>        |
|           |           | 4.4      | 0.0               | 2.0           | 1.0      | 0.5        | 2.0    | 0.0         | <b>54.2</b>        |

|   |     |     |     |     |     |     |     |             |
|---|-----|-----|-----|-----|-----|-----|-----|-------------|
|   | 4.6 | 0.0 | 2.0 | 2.0 | 0.0 | 0.0 | 0.0 | <b>66.7</b> |
|   | 4.9 | 0.0 | 2.0 | 2.0 | 0.0 | 1.0 | 0.0 | <b>58.3</b> |
|   | 5.1 | 1.0 | 2.0 | 2.0 | 0.5 | 2.0 | 0.0 | <b>37.5</b> |
|   | 5.3 | 1.0 | 2.0 | 2.0 | 0.5 | 1.0 | 0.0 | <b>45.8</b> |
|   | 5.8 | 1.0 | 2.0 | 2.0 | 0.5 | 2.0 | 1.0 | <b>29.2</b> |
|   | 6.4 | 1.0 | 1.0 | 2.0 | 0.5 | 0.0 | 1.0 | <b>54.2</b> |
|   | 6.7 | 1.0 | 2.0 | 2.0 | 0.5 | 2.0 | 0.0 | <b>37.5</b> |
| 4 | 3.4 | 0.0 | 0.0 | 2.0 | 0.0 | 0.0 | 0.0 | <b>83.3</b> |
|   | 3.6 | 0.0 | 0.0 | 1.0 | 0.0 | 1.0 | 0.0 | <b>83.3</b> |
|   | 3.6 | 0.0 | 0.0 | 1.0 | 0.0 | 1.0 | 0.0 | <b>83.3</b> |
|   | 3.8 | 0.0 | 0.0 | 1.0 | 0.5 | 1.0 | 0.0 | <b>79.2</b> |
|   | 5.4 | 0.0 | 0.0 | 2.0 | 0.0 | 1.0 | 0.0 | <b>75.0</b> |
|   | 5.8 | 0.0 | 0.0 | 2.0 | 0.5 | 2.0 | 0.0 | <b>62.5</b> |
|   | 6.1 | 1.0 | 0.0 | 2.0 | 1.5 | 0.0 | 0.0 | <b>62.5</b> |
|   | 6.4 | 1.0 | 0.0 | 2.0 | 1.5 | 1.0 | 1.0 | <b>45.8</b> |
|   | 6.9 | 1.0 | 1.0 | NA  | 0.5 | 2.0 | 1.0 | <b>54.2</b> |
|   | 7.5 | 1.0 | 0.0 | 2.0 | 2.0 | 1.0 | 1.0 | <b>41.7</b> |
|   | 7.8 | 1.0 | 1.0 | 2.0 | 1.0 | 2.0 | 1.0 | <b>33.3</b> |
|   | 5   | 2.8 | 0.0 | 0.0 | 2.0 | 0.0 | 0.0 | <b>83.3</b> |
|   |     | 3.1 | 0.0 | 1.0 | 1.0 | 0.5 | 1.0 | <b>62.5</b> |
|   |     | 3.3 | 0.0 | 0.0 | 2.0 | 0.0 | 0.0 | <b>83.3</b> |
|   |     | 3.6 | 0.0 | 1.0 | 2.0 | 0.0 | 0.0 | <b>75.0</b> |
|   |     | 3.8 | 0.0 | 1.0 | 2.0 | 0.5 | 1.0 | <b>62.5</b> |
|   |     | 4.0 | 0.0 | 0.0 | 2.0 | 0.0 | 2.0 | <b>66.7</b> |
|   |     | 4.7 | 0.0 | 2.0 | 1.0 | 0.5 | 1.5 | <b>58.3</b> |
|   |     | 4.9 | 0.0 | 1.0 | 2.0 | 0.0 | 2.0 | <b>58.3</b> |
|   |     | 5.3 | 0.0 | 0.0 | 2.0 | 0.5 | 0.0 | <b>79.2</b> |
|   |     | 5.9 | 0.0 | 1.0 | 2.0 | 0.0 | 2.0 | <b>58.3</b> |
|   |     | 6.3 | 0.0 | 1.0 | 2.0 | 0.0 | 1.0 | <b>66.7</b> |
|   |     | 6.8 | 0.0 | 1.0 | 1.0 | 0.0 | 2.0 | <b>66.7</b> |
|   |     | 7.2 | 0.0 | 2.0 | 2.0 | 0.0 | 2.0 | <b>50.0</b> |
|   |     | 7.9 | 0.0 | 2.0 | 2.0 | 0.0 | 2.0 | <b>50.0</b> |
|   | 6   | 2.8 | 0.0 | 0.0 | 2.0 | 0.0 | 2.0 | <b>66.7</b> |
|   |     | 3.1 | 0.0 | 0.0 | 2.0 | 0.0 | 2.0 | <b>66.7</b> |
|   |     | 3.3 | 0.0 | 0.0 | 2.0 | 0.0 | 1.0 | <b>70.8</b> |
|   |     | 3.6 | 0.0 | 0.0 | 2.0 | 0.5 | 1.0 | <b>70.8</b> |
|   |     | 3.8 | 0.0 | 1.0 | 2.0 | 0.0 | 2.0 | <b>58.3</b> |
|   |     | 4.7 | 0.0 | 2.0 | 2.0 | 0.0 | 1.0 | <b>50.0</b> |

MU/tr-IS

|   |     |     |     |     |     |     |     |             |
|---|-----|-----|-----|-----|-----|-----|-----|-------------|
|   | 4.9 | 0.0 | 0.0 | 1.0 | 0.0 | 1.0 | 0.0 | <b>83.3</b> |
|   | 5.3 | 0.0 | 1.0 | 2.0 | 0.5 | 2.0 | 1.0 | <b>45.8</b> |
|   | 5.9 | 0.0 | 2.0 | 2.0 | 0.5 | 2.0 | 1.0 | <b>37.5</b> |
|   | 6.3 | 0.0 | 1.0 | 1.0 | 0.0 | 0.0 | 0.0 | <b>83.3</b> |
|   | 6.8 | 0.0 | 0.0 | 2.0 | 0.0 | 0.0 | 0.0 | <b>83.3</b> |
|   | 7.2 | 0.0 | 0.0 | 2.0 | 0.5 | 1.0 | 0.0 | <b>70.8</b> |
|   | 7.9 | 0.0 | 1.0 | 2.0 | 0.0 | 2.0 | 0.0 | <b>58.3</b> |
| 7 | 2.8 | 0.0 | 0.0 | 2.0 | 0.0 | 0.0 | 0.0 | <b>83.3</b> |
|   | 3.1 | 0.0 | 2.0 | 2.0 | 0.0 | 0.0 | 0.0 | <b>66.7</b> |
|   | 3.3 | 0.0 | 1.0 | 2.0 | 0.0 | 0.0 | 0.0 | <b>75.0</b> |
|   | 3.6 | 0.0 | 1.0 | 2.0 | 0.5 | 2.0 | 0.0 | <b>54.2</b> |
|   | 3.8 | 0.0 | 2.0 | 2.0 | 0.0 | 1.0 | 0.0 | <b>58.3</b> |
|   | 4.0 | 0.0 | 2.0 | 2.0 | 0.0 | 0.0 | 0.0 | <b>66.7</b> |
|   | 4.7 | 0.0 | 2.0 | 1.0 | 0.5 | 0.0 | 1.0 | <b>62.5</b> |
|   | 4.9 | 0.0 | 2.0 | 1.0 | 0.5 | 0.0 | 0.0 | <b>70.8</b> |
|   | 5.3 | 0.0 | 2.0 | 1.0 | 0.5 | 0.0 | 0.0 | <b>70.8</b> |
|   | 5.9 | 0.0 | 2.0 | 2.0 | 0.5 | 1.0 | 0.0 | <b>54.2</b> |
|   | 6.3 | 0.0 | 2.0 | 2.0 | 0.0 | 2.0 | 0.0 | <b>50.0</b> |
|   | 6.8 | 0.0 | 2.0 | 2.0 | 0.5 | 0.0 | 0.0 | <b>62.5</b> |
|   | 7.2 | 0.0 | 1.0 | 2.0 | 0.5 | 2.0 | 0.0 | <b>54.2</b> |
|   | 7.9 | 0.0 | 2.0 | 2.0 | 1.0 | 2.0 | 0.0 | <b>41.7</b> |
| 8 | 2.8 | 0.0 | 0.0 | 2.0 | 0.0 | 2.0 | 0.0 | <b>66.7</b> |
|   | 3.1 | 0.0 | 2.0 | 2.0 | 0.0 | 2.0 | 0.0 | <b>50.0</b> |
|   | 3.3 | 0.0 | 0.0 | 2.0 | 0.5 | 1.0 | 0.0 | <b>70.8</b> |
|   | 3.5 | 0.0 | 0.0 | 2.0 | 0.0 | 2.0 | 0.0 | <b>66.7</b> |
|   | 4.0 | 0.0 | 0.0 | 2.0 | 0.5 | 1.0 | 1.0 | <b>62.5</b> |
|   | 4.6 | 0.0 | 0.0 | 2.0 | 1.0 | 2.0 | 0.0 | <b>58.3</b> |
|   | 4.9 | 0.0 | 2.0 | 2.0 | 1.0 | 1.0 | 0.0 | <b>50.0</b> |
|   | 5.1 | 0.0 | 2.0 | 2.0 | 1.0 | 0.0 | 1.0 | <b>50.0</b> |
|   | 5.4 | 0.0 | 1.0 | 2.0 | 1.0 | 0.0 | 0.0 | <b>66.7</b> |
|   | 5.6 | 0.0 | 2.0 | 2.0 | 1.0 | 2.0 | 0.0 | <b>41.7</b> |
|   | 6.4 | 0.0 | 0.0 | 1.0 | 0.5 | 2.0 | 1.0 | <b>62.5</b> |
|   | 6.5 | 0.0 | 2.0 | 2.0 | 1.0 | 2.0 | 0.0 | <b>41.7</b> |
|   | 6.7 | 0.0 | 2.0 | 2.0 | 0.5 | 2.0 | 0.0 | <b>45.8</b> |
|   | 7.0 | 0.0 | 1.0 | 2.0 | 1.0 | 1.0 | 0.0 | <b>58.3</b> |
|   | 7.2 | 0.0 | 2.0 | 2.0 | 1.0 | 2.0 | 0.0 | <b>41.7</b> |
|   | 7.7 | 0.0 | 2.0 | 2.0 | 1.5 | 0.0 | 0.0 | <b>54.2</b> |
|   | 7.9 | 0.0 | 1.0 | 2.0 | 1.0 | 2.0 | 0.0 | <b>50.0</b> |

|          |     |     |     |     |     |     |     |             |             |
|----------|-----|-----|-----|-----|-----|-----|-----|-------------|-------------|
|          |     | 8.4 | 0.0 | 2.0 | 2.0 | 1.5 | 2.0 | 0.0         | <b>37.5</b> |
|          |     | 8.7 | 0.0 | 2.0 | 2.0 | 1.0 | 1.0 | 2.0         | <b>33.3</b> |
| mo/no-IS | 9   | 2.9 | 0.0 | 0.0 | 1.0 | 1.0 | 0.0 | 1.0         | <b>75.0</b> |
|          |     | 2.9 | 0.0 | 0.0 | 1.0 | 1.0 | 0.0 | 1.0         | <b>75.0</b> |
|          |     | 2.9 | 0.0 | 0.0 | 1.0 | 1.0 | 0.0 | 1.0         | <b>75.0</b> |
|          |     | 3.5 | 0.0 | 0.0 | 0.0 | 0.0 | 0.5 | 1.0         | <b>87.5</b> |
|          |     | 3.7 | 1.0 | 0.0 | 2.0 | 1.0 | 0.5 | 1.0         | <b>54.2</b> |
|          |     | 3.9 | 0.0 | 1.0 | 1.5 | 1.0 | 1.0 | 1.0         | <b>54.2</b> |
|          |     | 4.0 | 0.0 | 1.0 | 1.0 | 1.0 | 1.5 | 1.0         | <b>54.2</b> |
|          |     | 4.2 | 0.0 | 0.0 | 1.5 | 1.0 | 1.5 | 2.0         | <b>50.0</b> |
|          |     | 4.4 | 0.0 | 1.0 | 2.0 | 1.0 | 0.5 | 2.0         | <b>45.8</b> |
|          |     | 4.7 | 0.0 | 1.0 | 2.0 | 2.0 | 1.0 | 1.0         | <b>41.7</b> |
|          |     | 4.9 | 0.0 | 1.0 | 2.0 | 2.0 | 1.0 | 1.0         | <b>41.7</b> |
|          |     | 5.1 | 0.0 | 1.0 | 1.5 | 1.5 | 2.0 | 1.0         | <b>41.7</b> |
|          |     | 5.3 | 0.0 | 1.0 | 2.0 | 2.0 | 2.0 | 1.0         | <b>33.3</b> |
|          |     | 5.6 | 0.0 | 1.0 | 2.0 | 1.5 | 1.0 | 1.0         | <b>45.8</b> |
|          |     | 5.8 | 0.0 | 2.0 | 2.0 | 1.5 | 1.0 | 1.0         | <b>37.5</b> |
|          |     | 6.0 | 0.0 | 2.0 | 2.0 | 1.5 | 1.0 | 1.0         | <b>37.5</b> |
|          |     | 6.2 | 0.0 | 1.0 | 2.0 | 1.0 | 1.5 | 1.0         | <b>45.8</b> |
|          |     | 6.5 | 0.0 | 2.0 | 2.0 | 1.5 | 2.0 | 0.0         | <b>37.5</b> |
|          |     | 6.7 | 0.0 | 2.0 | 2.0 | 1.5 | 2.0 | 0.0         | <b>37.5</b> |
|          |     | 7.0 | 0.0 | 1.0 | 2.0 | 2.0 | 2.0 | 0.0         | <b>41.7</b> |
|          | 7.2 | 0.0 | 2.0 | 2.0 | 2.0 | 2.0 | 1.0 | <b>25.0</b> |             |
|          | 7.4 | 0.0 | 2.0 | 2.0 | 2.0 | 1.0 | 0.0 | <b>41.7</b> |             |
|          | 7.7 | 0.0 | 2.0 | 2.0 | 2.0 | 0.0 | 1.0 | <b>41.7</b> |             |
|          | 7.9 | 0.0 | 2.0 | 2.0 | 2.0 | 0.0 | 0.0 | <b>50.0</b> |             |
|          | 8.3 | 0.0 | 1.0 | 1.0 | 1.0 | 1.5 | 1.0 | <b>54.2</b> |             |
|          | 10  | 2.9 | 0.0 | 0.0 | 0.0 | 0.0 | 0.0 | 1.0         | <b>91.7</b> |
|          |     | 2.9 | 0.0 | 0.0 | 0.0 | 0.0 | 0.0 | 1.0         | <b>91.7</b> |
|          |     | 2.9 | 0.0 | 0.0 | 0.0 | 0.0 | 0.0 | 1.0         | <b>91.7</b> |
|          |     | 3.5 | 0.0 | 0.0 | 0.0 | 0.0 | 1.0 | 0.0         | <b>91.7</b> |
|          |     | 3.7 | 1.0 | 0.0 | 1.0 | 0.0 | 1.0 | 0.0         | <b>75.0</b> |
|          |     | 3.9 | 0.0 | 1.0 | 1.0 | 1.0 | 0.5 | 2.0         | <b>54.2</b> |
|          |     | 4.0 | 0.0 | 0.0 | 1.0 | 0.0 | 0.5 | 1.0         | <b>79.2</b> |
|          |     | 4.2 | 0.0 | 0.0 | 2.0 | 1.0 | 1.0 | 1.0         | <b>58.3</b> |
|          |     | 4.4 | 0.0 | 0.0 | 1.0 | 0.5 | 1.0 | 0.0         | <b>79.2</b> |
|          |     | 4.7 | 0.0 | 1.0 | 1.5 | 1.0 | 0.5 | 0.0         | <b>66.7</b> |

|    |     |     |     |     |     |     |     |             |
|----|-----|-----|-----|-----|-----|-----|-----|-------------|
|    | 4.9 | 0.0 | 1.0 | 1.0 | 0.0 | 0.5 | 0.5 | <b>75.0</b> |
|    | 5.1 | 0.0 | 1.0 | 1.0 | 1.0 | 1.0 | 1.0 | <b>58.3</b> |
|    | 5.3 | 0.0 | 1.0 | 1.0 | 1.0 | 1.0 | 1.5 | <b>54.2</b> |
|    | 5.6 | 0.0 | 1.0 | 2.0 | 1.0 | 1.5 | 1.0 | <b>45.8</b> |
|    | 5.8 | 0.0 | 1.0 | 2.0 | 1.5 | 1.5 | 1.0 | <b>41.7</b> |
|    | 6.0 | 0.0 | 1.0 | 1.5 | 1.0 | 1.0 | 1.0 | <b>54.2</b> |
|    | 6.2 | 0.0 | 1.0 | 2.0 | 1.5 | 1.0 | 1.0 | <b>45.8</b> |
|    | 6.5 | 0.0 | 1.0 | 2.0 | 1.0 | 2.0 | 2.0 | <b>33.3</b> |
|    | 6.7 | 0.0 | 1.0 | 2.0 | 1.0 | 2.0 | 1.0 | <b>41.7</b> |
|    | 7.0 | 0.0 | 2.0 | 1.0 | 1.0 | 2.0 | 1.0 | <b>41.7</b> |
|    | 7.2 | 0.0 | 1.0 | 2.0 | 1.5 | 1.0 | 1.0 | <b>45.8</b> |
|    | 7.4 | 0.0 | 2.0 | 1.0 | 1.5 | 2.0 | 2.0 | <b>29.2</b> |
|    | 7.7 | 1.0 | 2.0 | 2.0 | 1.0 | 1.5 | 1.0 | <b>29.2</b> |
|    | 7.9 | 0.0 | 2.0 | 1.0 | 2.0 | 2.0 | 1.0 | <b>33.3</b> |
|    | 8.3 | 0.0 | 2.0 | 2.0 | 2.0 | 1.5 | 1.0 | <b>29.2</b> |
|    | 8.6 | 1.0 | 1.0 | 2.0 | 2.0 | 0.0 | 1.0 | <b>41.7</b> |
|    | 8.8 | 1.0 | 2.0 | 2.0 | 2.0 | 1.5 | 0.0 | <b>29.2</b> |
|    | 9.0 | 0.0 | 2.0 | 1.0 | 2.0 | 2.0 | 1.0 | <b>33.3</b> |
| 11 | 2.5 | 0.0 | 0.0 | 2.0 | 0.0 | 0.0 | 0.0 | <b>83.3</b> |
|    | 2.5 | 0.0 | 0.0 | 2.0 | 0.0 | 0.0 | 0.0 | <b>83.3</b> |
|    | 3.0 | 0.0 | 0.0 | 2.0 | 0.0 | 0.0 | 0.0 | <b>83.3</b> |
|    | 3.0 | 0.0 | 0.0 | 2.0 | 0.0 | 0.0 | 0.0 | <b>83.3</b> |
|    | 3.2 | 0.0 | 0.0 | 2.0 | 0.0 | 0.0 | 0.0 | <b>83.3</b> |
|    | 3.4 | 0.0 | 0.0 | 2.0 | 0.0 | 0.0 | 0.0 | <b>83.3</b> |
|    | 3.6 | 0.0 | 0.0 | 1.0 | 0.0 | 0.0 | 0.0 | <b>91.7</b> |
|    | 5.0 | 0.0 | 0.0 | 1.0 | 0.0 | 0.0 | 1.0 | <b>83.3</b> |
|    | 5.2 | 0.0 | 1.0 | 2.0 | 0.0 | 0.0 | 0.0 | <b>75.0</b> |
|    | 5.5 | 0.0 | 0.0 | 2.0 | 0.5 | 0.0 | 0.0 | <b>79.2</b> |
|    | 5.9 | 0.0 | 0.0 | 2.0 | 0.5 | 0.0 | 0.0 | <b>79.2</b> |
|    | 6.4 | 0.0 | 1.0 | 2.0 | 0.5 | 0.0 | 0.0 | <b>70.8</b> |
|    | 7.2 | 0.0 | 0.0 | 2.0 | 0.5 | 0.0 | 0.0 | <b>79.2</b> |
|    | 7.3 | 0.0 | 1.0 | 2.0 | 0.5 | 1.0 | 1.0 | <b>54.2</b> |
|    | 7.5 | 0.0 | 0.0 | 2.0 | 0.5 | 0.0 | 1.0 | <b>70.8</b> |
|    | 7.9 | 0.0 | 0.0 | 1.0 | 0.5 | 0.0 | 0.0 | <b>87.5</b> |
|    | 8.0 | 0.0 | 0.0 | 2.0 | 1.0 | 1.0 | 1.0 | <b>58.3</b> |
|    | 8.2 | 0.0 | 0.0 | 2.0 | 0.0 | 0.0 | 2.0 | <b>66.7</b> |
|    | 8.7 | 0.0 | 0.0 | 2.0 | 0.5 | 1.0 | 1.0 | <b>62.5</b> |

|          |    |     |     |     |     |     |     |     |             |             |
|----------|----|-----|-----|-----|-----|-----|-----|-----|-------------|-------------|
|          |    | 8.9 | 0.0 | 0.0 | 2.0 | 1.0 | 1.0 | 1.0 | <b>58.3</b> |             |
|          |    | 9.4 | 0.0 | 1.0 | 2.0 | 0.5 | 1.0 | 1.0 | <b>54.2</b> |             |
| mo/tr-IS | 12 | 2.5 | 0.0 | 0.0 | 2.0 | 0.0 | 1.0 | 0.0 | <b>75.0</b> |             |
|          |    | 3.0 | 0.0 | 0.0 | 2.0 | 0.0 | 2.0 | 0.0 | <b>66.7</b> |             |
|          |    |     | 3.2 | 0.0 | 0.0 | 2.0 | 0.0 | 1.0 | 0.0         | <b>75.0</b> |
|          |    |     | 3.6 | 0.0 | 0.0 | 2.0 | 0.0 | 0.0 | 0.0         | <b>83.3</b> |
|          |    |     | 4.5 | 0.0 | 1.0 | 0.0 | 0.0 | 2.0 | 0.0         | <b>75.0</b> |
|          |    |     | 5.2 | 0.0 | 1.0 | 1.0 | 0.5 | 2.0 | 1.0         | <b>54.2</b> |
|          |    |     | 5.3 | 1.0 | 1.0 | 2.0 | 0.5 | 2.0 | 1.0         | <b>37.5</b> |
|          |    |     | 5.5 | 1.0 | 1.0 | 2.0 | 1.0 | 0.0 | 2.0         | <b>41.7</b> |
|          |    |     | 5.7 | 1.0 | 2.0 | 2.0 | 1.0 | 2.0 | 1.0         | <b>25.0</b> |
|          |    |     | 6.0 | 1.0 | 2.0 | 2.0 | 0.5 | 2.0 | 1.0         | <b>29.2</b> |
|          |    |     | 6.2 | 1.0 | 2.0 | 1.0 | 0.5 | 1.0 | 0.0         | <b>54.2</b> |
|          |    |     | 6.4 | 1.0 | 2.0 | 1.0 | 0.0 | 1.0 | 0.0         | <b>58.3</b> |
|          |    |     | 6.6 | 1.0 | 0.0 | 2.0 | 0.0 | 0.0 | 1.0         | <b>66.7</b> |
|          |    |     | 6.9 | 0.0 | 1.0 | 2.0 | 0.0 | 2.0 | 0.0         | <b>58.3</b> |
|          |    |     | 7.1 | 0.0 | 0.0 | 2.0 | 0.5 | 2.0 | 0.0         | <b>62.5</b> |
|          |    |     | 7.3 | 0.0 | 1.0 | 2.0 | 1.0 | 2.0 | 0.0         | <b>50.0</b> |
|          |    |     | 7.5 | 0.0 | 2.0 | 2.0 | 2.0 | 2.0 | 0.0         | <b>33.3</b> |
|          |    |     | 8.3 | 0.0 | 2.0 | 1.0 | 1.5 | 2.0 | 0.0         | <b>45.8</b> |
|          |    |     | 8.5 | 0.0 | 1.0 | 2.0 | 2.0 | 2.0 | 0.0         | <b>41.7</b> |
|          |    |     | 8.8 | 0.0 | 0.0 | 2.0 | 2.0 | 2.0 | 0.0         | <b>50.0</b> |
|          |    | 13  | 2.5 | 0.0 | 0.0 | 1.0 | 0.0 | 2.0 | 0.0         | <b>75.0</b> |
|          |    |     | 3.0 | 0.0 | 0.0 | 2.0 | 0.0 | 2.0 | 0.0         | <b>66.7</b> |
|          |    |     | 3.2 | 0.0 | 0.0 | 2.0 | 0.5 | 2.0 | 0.0         | <b>62.5</b> |
|          |    |     | 3.6 | 0.0 | 1.0 | 2.0 | 0.5 | 2.0 | 1.0         | <b>45.8</b> |
|          |    |     | 4.5 | 0.0 | 0.0 | 1.0 | 0.5 | 2.0 | 1.0         | <b>62.5</b> |
|          |    |     | 5.2 | 0.0 | 1.0 | 2.0 | 2.0 | 2.0 | 2.0         | <b>25.0</b> |
|          |    |     | 5.3 | 0.0 | 0.0 | 1.0 | 2.0 | 2.0 | 2.0         | <b>41.7</b> |
|          |    |     | 5.5 | 0.0 | 1.0 | 2.0 | 2.0 | 2.0 | 2.0         | <b>25.0</b> |
|          |    |     | 5.7 | 0.0 | 1.0 | 1.0 | 2.0 | 2.0 | 2.0         | <b>33.3</b> |
|          |    |     | 6.0 | 0.0 | 0.0 | 2.0 | 2.0 | 2.0 | 2.0         | <b>33.3</b> |
|          |    |     | 6.2 | 0.0 | 1.0 | 2.0 | 2.0 | 2.0 | 2.0         | <b>25.0</b> |
|          |    |     | 6.4 | 0.0 | 1.0 | 1.0 | 2.0 | 2.0 | 2.0         | <b>33.3</b> |
|          |    |     | 6.6 | 0.0 | 0.0 | 2.0 | 2.0 | 2.0 | 2.0         | <b>33.3</b> |
|          |    | 6.9 | 0.0 | 0.0 | 1.0 | 2.0 | 2.0 | 2.0 | <b>41.7</b> |             |
|          |    | 7.1 | 0.0 | 0.0 | 1.0 | 2.0 | 1.0 | 2.0 | <b>50.0</b> |             |

|     |     |     |     |     |     |     |             |             |
|-----|-----|-----|-----|-----|-----|-----|-------------|-------------|
| 14  | 7.3 | 0.0 | 1.0 | 1.0 | 2.0 | 2.0 | 2.0         | <b>33.3</b> |
|     | 7.5 | 0.0 | 0.0 | 2.0 | 1.5 | 2.0 | 2.0         | <b>37.5</b> |
|     | 8.3 | 0.0 | 0.0 | 1.0 | 2.0 | 2.0 | 2.0         | <b>41.7</b> |
|     | 8.5 | 0.0 | 0.0 | 2.0 | 2.0 | 2.0 | 2.0         | <b>33.3</b> |
|     | 8.8 | 0.0 | 0.0 | 2.0 | 2.0 | 1.0 | 2.0         | <b>41.7</b> |
|     | 2.9 | 0.0 | 0.0 | 2.0 | 0.0 | 1.0 | 0.0         | <b>75.0</b> |
|     | 3.1 | 0.0 | 0.0 | 2.0 | 0.0 | 2.0 | 0.0         | <b>66.7</b> |
|     | 3.4 | 0.0 | 0.0 | 2.0 | 0.0 | 1.0 | 0.0         | <b>75.0</b> |
|     | 3.8 | 0.0 | 0.0 | 1.0 | 0.0 | 2.0 | 0.0         | <b>75.0</b> |
|     | 4.0 | 0.0 | 1.0 | 2.0 | 0.0 | 1.0 | 0.0         | <b>66.7</b> |
|     | 4.5 | 0.0 | 0.0 | 2.0 | 0.0 | 0.0 | 0.0         | <b>83.3</b> |
|     | 4.9 | 1.0 | 2.0 | 1.0 | 1.0 | 2.0 | 1.0         | <b>33.3</b> |
|     | 5.2 | 1.0 | 0.0 | 2.0 | 0.5 | 2.0 | 0.0         | <b>54.2</b> |
|     | 5.4 | 1.0 | 0.0 | 2.0 | 0.0 | 2.0 | 0.0         | <b>58.3</b> |
|     | 5.7 | 1.0 | 1.0 | 2.0 | 1.0 | 1.0 | 0.0         | <b>50.0</b> |
|     | 6.1 | 1.0 | 0.0 | 2.0 | 1.0 | 1.0 | 0.0         | <b>58.3</b> |
|     | 6.5 | 1.0 | 0.0 | 1.0 | 1.0 | 1.0 | 1.0         | <b>58.3</b> |
|     | 6.8 | 1.0 | 0.0 | 2.0 | 0.5 | 1.0 | 0.0         | <b>62.5</b> |
|     | 7.5 | 1.0 | 0.0 | 2.0 | 0.0 | 2.0 | 1.0         | <b>50.0</b> |
|     | 7.7 | 1.0 | 1.0 | 2.0 | 1.5 | 0.0 | 0.0         | <b>54.2</b> |
| 8.2 | 1.0 | 1.0 | 2.0 | 1.5 | 1.0 | 0.0 | <b>45.8</b> |             |
| 8.4 | 1.0 | 0.0 | 2.0 | 1.5 | 0.0 | 0.0 | <b>62.5</b> |             |
| 15  | 2.9 | 0.0 | 0.0 | 1.0 | 0.0 | 0.0 | 0.0         | <b>91.7</b> |
|     | 3.1 | 0.0 | 0.0 | 2.0 | 0.0 | 1.0 | 0.0         | <b>75.0</b> |
|     | 3.4 | 0.0 | 0.0 | 2.0 | 0.0 | 0.0 | 0.0         | <b>83.3</b> |
|     | 3.8 | 0.0 | 0.0 | 2.0 | 0.0 | 2.0 | 0.0         | <b>66.7</b> |
|     | 4.0 | 0.0 | 0.0 | 2.0 | 0.0 | 0.0 | 0.0         | <b>83.3</b> |
|     | 4.5 | 0.0 | 0.0 | 2.0 | 1.0 | 2.0 | 0.0         | <b>58.3</b> |
|     | 4.9 | 1.0 | 0.0 | 2.0 | 0.5 | 1.0 | 0.0         | <b>62.5</b> |
|     | 5.2 | 1.0 | 0.0 | 2.0 | 0.0 | 1.0 | 0.0         | <b>66.7</b> |
|     | 5.4 | 1.0 | 0.0 | 2.0 | 0.0 | 1.0 | 0.0         | <b>66.7</b> |
|     | 5.7 | 1.0 | 1.0 | 2.0 | 0.0 | 0.0 | 0.0         | <b>66.7</b> |
|     | 6.1 | 1.0 | 0.0 | 2.0 | 0.0 | 0.0 | 0.0         | <b>75.0</b> |
|     | 6.5 | 1.0 | 0.0 | 2.0 | 0.0 | 0.0 | 0.0         | <b>75.0</b> |
|     | 6.8 | 1.0 | 0.0 | 2.0 | 0.0 | 0.0 | 0.0         | <b>75.0</b> |
|     | 7.5 | 1.0 | 0.0 | 2.0 | 0.0 | 1.0 | 0.0         | <b>66.7</b> |
| 7.7 | 1.0 | 0.0 | 2.0 | 0.0 | 0.0 | 0.0 | <b>75.0</b> |             |

|    |     |     |     |     |     |     |     |             |
|----|-----|-----|-----|-----|-----|-----|-----|-------------|
|    | 8.2 | 0.0 | 0.0 | 2.0 | 0.5 | 2.0 | 0.0 | <b>62.5</b> |
|    | 8.4 | 0.0 | 1.0 | 2.0 | 0.0 | 1.0 | 1.0 | <b>58.3</b> |
| 16 | 3.1 | 0.0 | 0.0 | 2.0 | 0.0 | 1.0 | 0.0 | <b>75.0</b> |
|    | 3.3 | 0.0 | 0.0 | 2.0 | 0.5 | 2.0 | 0.0 | <b>62.5</b> |
|    | 3.5 | 0.0 | 1.0 | 2.0 | 0.0 | 1.0 | 1.0 | <b>58.3</b> |
|    | 3.7 | 0.0 | 1.0 | 2.0 | 0.0 | 2.0 | 1.0 | <b>50.0</b> |
|    | 4.6 | 0.0 | 2.0 | 2.0 | 1.0 | 2.0 | 0.0 | <b>41.7</b> |
|    | 4.7 | 0.0 | 1.0 | 1.0 | 1.0 | 2.0 | 1.0 | <b>50.0</b> |
|    | 4.9 | 0.0 | 1.0 | 1.0 | 1.0 | 2.0 | 2.0 | <b>41.7</b> |
|    | 5.1 | 0.0 | 1.0 | 2.0 | 1.0 | 2.0 | 1.0 | <b>41.7</b> |
|    | 5.8 | 0.0 | 1.0 | 1.0 | 1.0 | 1.0 | 2.0 | <b>50.0</b> |
|    | 6.0 | 0.0 | 2.0 | 1.0 | 1.5 | 2.0 | 1.0 | <b>37.5</b> |
|    | 6.9 | 0.0 | 1.0 | 1.0 | 1.5 | 2.0 | 2.0 | <b>37.5</b> |
|    | 7.2 | 0.0 | 2.0 | 2.0 | 1.0 | 1.0 | 0.0 | <b>50.0</b> |
|    | 7.7 | 0.0 | 1.0 | 1.0 | 1.0 | 1.0 | 1.0 | <b>58.3</b> |
|    | 8.1 | 0.0 | 0.0 | 1.0 | 2.0 | 1.0 | 1.0 | <b>58.3</b> |
|    | 8.5 | 0.0 | 2.0 | 2.0 | 2.0 | 2.0 | 1.0 | <b>25.0</b> |
|    | 8.8 | 0.0 | 1.0 | 2.0 | 1.0 | 2.0 | 0.0 | <b>50.0</b> |
